# Supplementary material
Source: HighWire-hosted journal article supplement (https://bmjopen.bmj.com/content/11/6/e045679)
Supplement: inline-supplementary-material-3 [file inline-supplementary-material-3.pdf]

## Audit Notification

|                    |                                                                                                                                       |
|--------------------|---------------------------------------------------------------------------------------------------------------------------------------|
| Number:            | <b>6237</b>                                                                                                                           |
| Page:              | <b>Approved Local Audit</b>                                                                                                           |
| Title:             | <b>A global study looking at the impact of the Coronavirus disease (COVID-19) on the care of childhood cancers (COVIDPaedsCancer)</b> |
| Request Date:      | <b>03/08/2020</b>                                                                                                                     |
| Target Date:       | <b>31/12/2020</b>                                                                                                                     |
| Start Date:        | <b>//</b>                                                                                                                             |
| Owner:             | <b>Kokilakumari Lakhoo</b>                                                                                                            |
| Responsibility Of: | <b>Mariam Lami</b>                                                                                                                    |
| Manager Feedback:  |                                                                                                                                       |
